# Supplementary material for: ProteoMutaMetrics: machine learning approaches for solute carrier family 6 mutation pathogenicity prediction
Source: Royal Society of Chemistry journal article supplement (doi:10.1039/d4ra00748d), 2024-01-01
Supplement: d4ra00748d1.pdf [file d4ra00748d1.pdf]

## Supplementary material

Table S1 A summary of the SLC6 family with experimentally solved structures in PDB

| SLC name | PDB ID  | Method  | Resolution | Sequence length | Sequence modelled | Percentage coverage |
|----------|---------|---------|------------|-----------------|-------------------|---------------------|
| SLC6A1   | 7SK2    | Cryo-EM | 3.82 Å     | 578             | 532               | 92%                 |
|          | 6M17    | Cryo-EM | 2.9 Å      | 654             | 605               | 93%                 |
|          | 6M18    | Cryo-EM | 2.9 Å      | 654             | 605               | 93%                 |
| SLC6A19  | 6M1D    | Cryo-EM | 4.5 Å      | 654             | 605               | 93%                 |
|          | 7DWX    | Cryo-EM | 8.3 Å      |                 | -                 |                     |
|          | 7V61    | Cryo-EM | 3.2 Å      | 654             | 605               | 93%                 |
|          | 6VRH    | Cryo-EM | 3.3 Å      | 630             | 541               | 86%                 |
|          | 6VRK    | Cryo-EM | 4.1 Å      | 630             | 541               | 86%                 |
|          | 6VRL    | Cryo-EM | 3.8 Å      | 630             | 541               | 86%                 |
|          | 5I6X    | X-ray   | 3.14 Å     | 549             | 544               | 99%                 |
|          | 5I6Z    | X-ray   | 4.53 Å     | 549             | 544               | 99%                 |
|          | 5I71    | X-ray   | 3.15 Å     | 549             | 544               | 99%                 |
|          | 5I73    | X-ray   | 3.24 Å     | 549             | 540               | 98%                 |
|          | 5I74    | X-ray   | 3.4 Å      | 549             | 542               | 99%                 |
|          | 5I75    | X-ray   | 4.49 Å     | 549             | 540               | 98%                 |
|          | 6AWN    | X-ray   | 3.62 Å     | 549             | 544               | 99%                 |
|          | 6AWO    | X-ray   | 3.52 Å     | 549             | 544               | 99%                 |
|          | 6AWP    | X-ray   | 3.8 Å      | 549             | 544               | 99%                 |
| SLC6A4   | 6AWQ    | X-ray   | 4.05 Å     | 549             | 544               | 99%                 |
|          | 6W2B    | X-ray   | 4.7 Å      | 549             | 544               | 99%                 |
|          | 6W2C    | X-ray   | 6.3 Å      | 549             | 544               | 99%                 |
|          | 7LWD    | Cryo-EM | 3.65 Å     | 541             | 541               | 100%                |
|          | 6DZZ    | Cryo-EM | 3.6 Å      | 540             | 540               | 100%                |
|          | 7LI6    | Cryo-EM | 3.5 Å      | 539             | 539               | 100%                |
|          | 7LI8    | Cryo-EM | 3.9 Å      | 539             | 539               | 100%                |
|          | 7LI9    | Cryo-EM | 3.9 Å      | 539             | 539               | 100%                |
|          | 7LIA    | Cryo-EM | 3.3 Å      | 539             | 539               | 100%                |
|          | 7LI7    | Cryo-EM | 4.1 Å      | 537             | 537               | 100%                |
|          | 7MGW    | Cryo-EM | 3.5 Å      | 537             | 537               | 100%                |
| 6DZV     | Cryo-EM | 4.2 Å   | 537        | 537             | 100%              |                     |

|        |      |         |        |     |     |      |
|--------|------|---------|--------|-----|-----|------|
|        | 6DZW | Cryo-EM | 4.3 Å  | 537 | 537 | 100% |
|        | 6DZY | Cryo-EM | 4.1 Å  | 537 | 537 | 100% |
| SLC6A9 | 6ZBV | X-ray   | 3.4 Å  | 577 | 539 | 93%  |
|        | 6ZPL | X-ray   | 3.94 Å | 576 | 518 | 90%  |

Note: The PDB ID was recorded together with the entity number of the respective SLC.

Table S2 The unique transcript ID and the SLC name of the collected mutation data

| SLC name | Transcript ID   | Canonical |
|----------|-----------------|-----------|
| SLC6A1   | ENST00000287766 | True      |
|          | ENST00000644175 |           |
| SLC6A2   | ENST00000568943 | True      |
| SLC6A3   | ENST00000270349 | True      |
| SLC6A4   | ENST00000650711 | True      |
| SLC6A5   | ENST00000525748 | True      |
| SLC6A6   | ENST00000622186 | True      |
| SLC6A7   | ENST00000230671 | True      |
| SLC6A8   | ENST00000253122 | True      |
|          | ENST00000413787 |           |
|          | ENST00000429147 |           |
|          | ENST00000457723 |           |
| SLC6A9   | ENST00000372310 | True      |
| SLC6A12  | ENST00000684302 | True      |
| SLC6A13  | ENST00000343164 | True      |
| SLC6A15  | ENST00000266682 | True      |
| SLC6A16  | ENST00000335875 | True      |
| SLC6A17  | ENST00000331565 | True      |
| SLC6A18  | ENST00000324642 | True      |
| SLC6A19  | ENST00000304460 | True      |
| SLC6A20  | ENST00000358525 | True      |

Note: Both canonical sequences and isoforms are included in this collection.

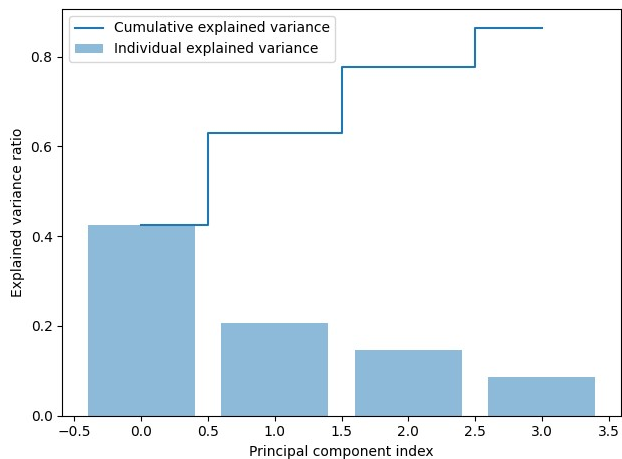

A

B

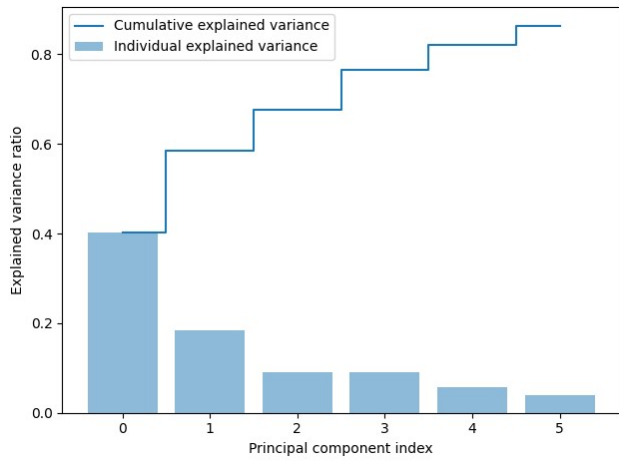

Figure S1 The principal component analysis. **A.** Full sequence calculation. **B.** Domain-wise calculation.

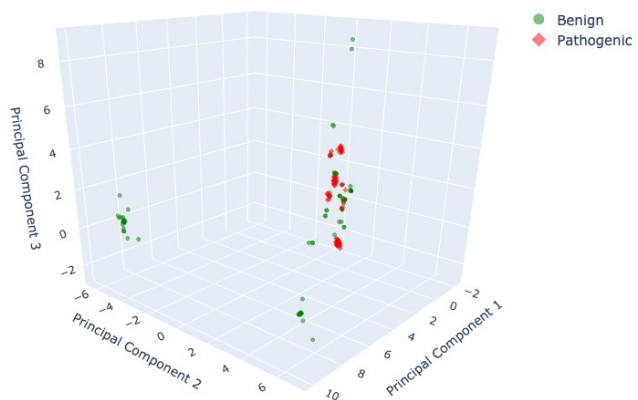

Figure S2 3D scatter plot of first three components from the full sequence PCA analysis

The pathogenic data point is marked in red diamond, while the benign one is in green circle.

### A Random Forest

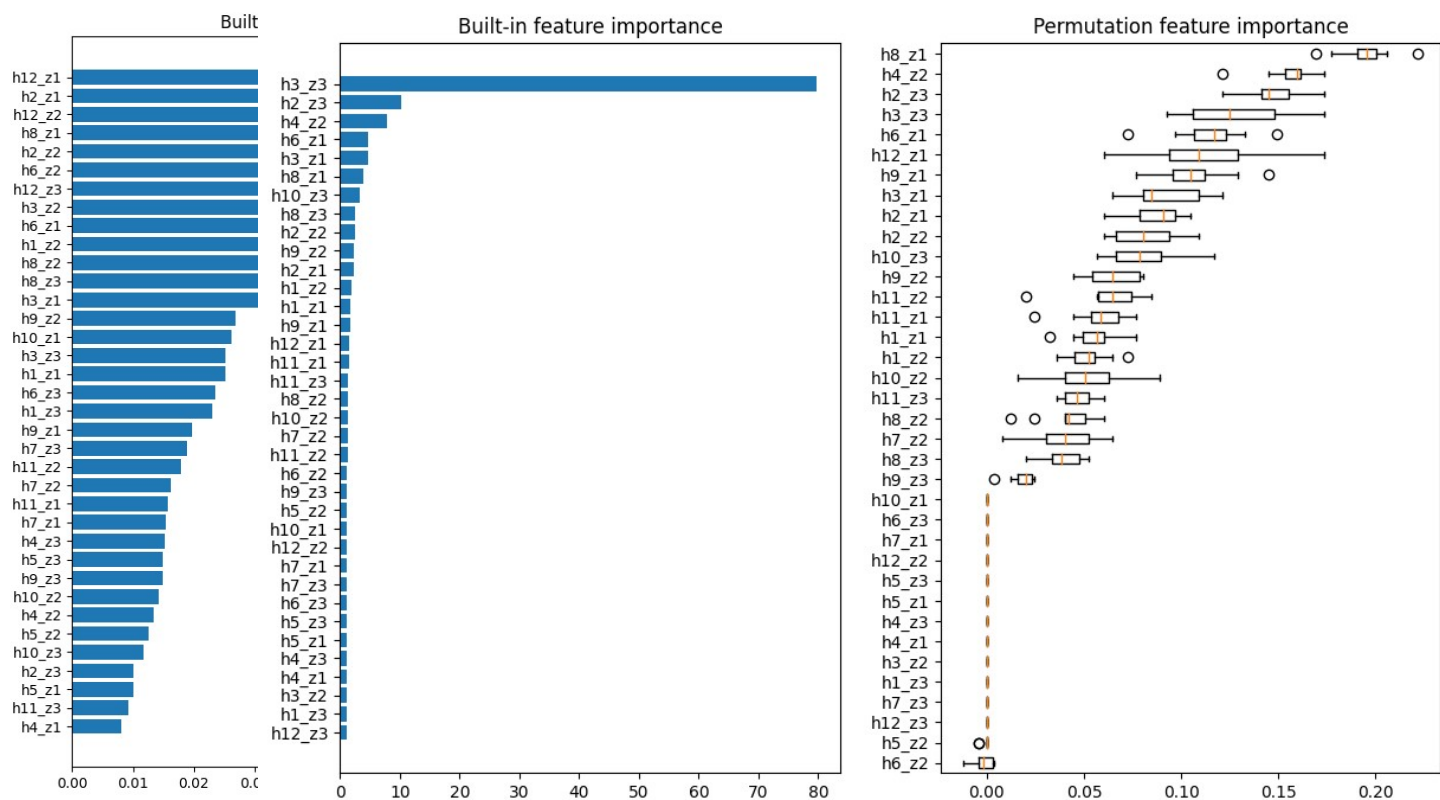

### C Logistic Regression

### B XGBoost

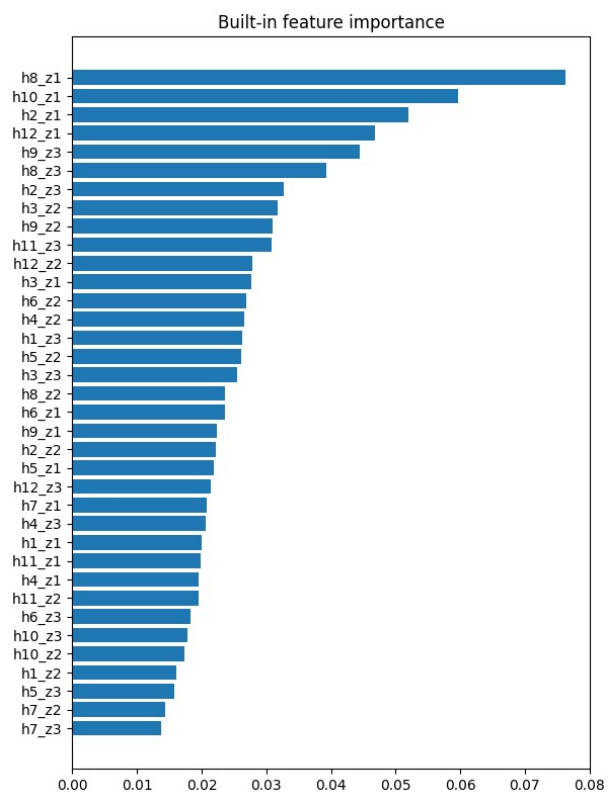

### D Support Vector Machine

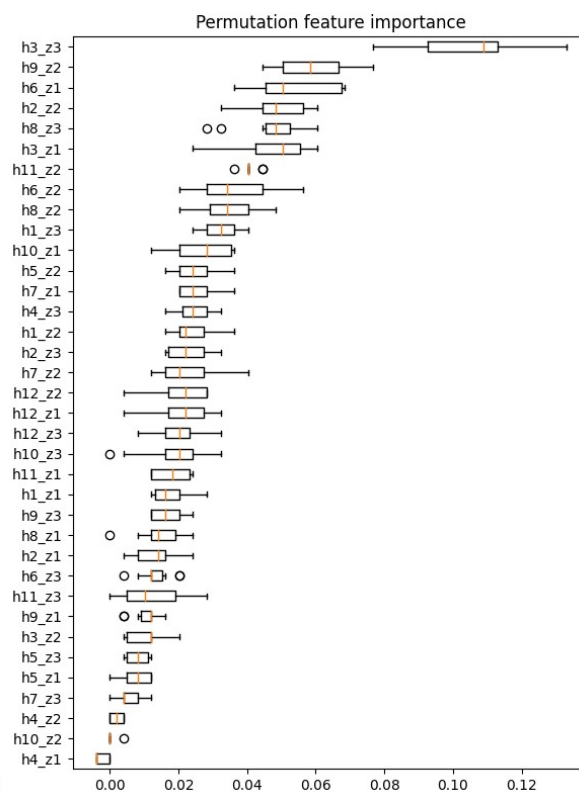

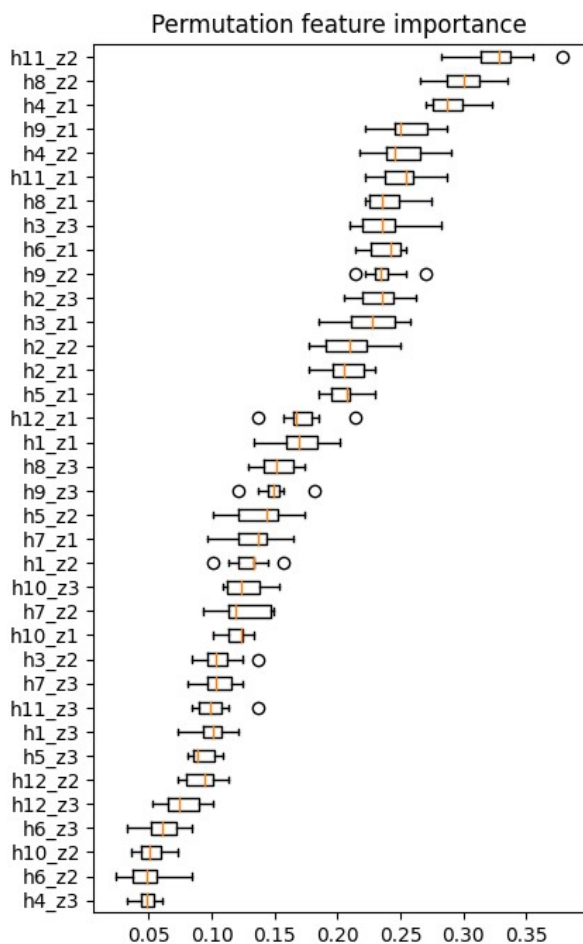

**Figure S3 Built-in feature importance attributes horizontal bar plots and additional permutation feature importance box plots**

**A.** Random Forest. **B.** XGBoost. **C.** Logistic Regression. **D.** Support Vector Machine. The features are named with the helix number and the descriptor name.
